# Supplementary material
Source: MDPI journal article supplement (https://www.mdpi.com/2071-1050/10/4/1207)
Supplement: s1 [file s1]

## ANNEXURE 2. DESCRIPTIVE STATISTICS OF THE CHI-SQUARE TESTS

**Table A2-1.** Descriptive statistics of the Chi-square tests for attitude items.

| Item | Descriptor | Statistic | Boardwalk Meander |               | Silver Lakes |               |
|------|------------|-----------|-------------------|---------------|--------------|---------------|
|      |            |           | Recycling         | Non-recycling | Recycling    | Non-recycling |
| A1   | Agree      | n         | 73                | 56            | 236          | 49            |
|      |            | %         | 100.0             | 98.2          | 99.2         | 96.1          |
|      | Neutral    | n         | 0                 | 1             | 2            | 0             |
|      |            | %         | 0.0               | 1.8           | 0.8          | 0.0           |
|      | Disagree   | n         | 0                 | 0             | 0            | 2             |
|      |            | %         | 0.0               | 0.0           | 0.0          | 3.9           |
| A2   | Agree      | n         | 9                 | 11            | 32           | 14            |
|      |            | %         | 12.7              | 19.6          | 14.0         | 27.5          |
|      | Neutral    | n         | 11                | 5             | 29           | 10            |
|      |            | %         | 15.5              | 8.9           | 12.7         | 19.6          |
|      | Disagree   | n         | 51                | 40            | 168          | 27            |
|      |            | %         | 71.8              | 71.4          | 73.4         | 52.9          |
| A3   | Agree      | n         | 71                | 55            | 226          | 48            |
|      |            | %         | 97.3              | 96.5          | 95.4         | 94.1          |
|      | Neutral    | n         | 1                 | 1             | 8            | 1             |
|      |            | %         | 1.4               | 1.8           | 3.4          | 2.0           |
|      | Disagree   | n         | 1                 | 1             | 3            | 2             |
|      |            | %         | 1.4               | 1.8           | 1.3          | 3.9           |
| A4   | Agree      | n         | 12                | 11            | 20           | 14            |
|      |            | %         | 16.7              | 19.3          | 8.4          | 27.5          |
|      | Neutral    | n         | 4                 | 8             | 10           | 9             |
|      |            | %         | 5.6               | 14.0          | 4.2          | 17.6          |
|      | Disagree   | n         | 56                | 38            | 207          | 28            |
|      |            | %         | 77.8              | 66.7          | 87.3         | 54.9          |

**Table A2-2.** Descriptive statistics of the Chi-square tests for subjective norm items.

| Item | Descriptor | Statistic | Boardwalk Meander |               | Silver Lakes |               |
|------|------------|-----------|-------------------|---------------|--------------|---------------|
|      |            |           | Recycling         | Non-recycling | Recycling    | Non-recycling |
| SN1  | Agree      | n         | 51                | 35            | 188          | 24            |
|      |            | %         | 69.9              | 62.5          | 80.0         | 47.1          |
|      | Neutral    | n         | 16                | 11            | 34           | 20            |
|      |            | %         | 21.9              | 19.6          | 14.5         | 39.2          |
|      | Disagree   | n         | 6                 | 10            | 13           | 7             |
|      |            | %         | 8.2               | 17.9          | 5.5          | 13.7          |
| SN2  | Agree      | n         | 51                | 41            | 174          | 31            |
|      |            | %         | 70.8              | 73.2          | 77.0         | 63.3          |
|      | Neutral    | n         | 16                | 11            | 40           | 13            |
|      |            | %         | 22.2              | 19.6          | 17.7         | 26.5          |
|      | Disagree   | n         | 5                 | 4             | 12           | 5             |
|      |            | %         | 6.9               | 7.1           | 5.3          | 10.2          |
| SN3  | Agree      | n         | 23                | 20            | 118          | 22            |
|      |            | %         | 31.5              | 36.4          | 52.7         | 44.0          |
|      | Neutral    | n         | 18                | 9             | 63           | 21            |
|      |            | %         | 24.7              | 16.4          | 28.1         | 42.0          |
|      | Disagree   | n         | 32                | 26            | 43           | 7             |
|      |            | %         | 43.8              | 47.3          | 19.2         | 14.0          |

**Table A2-3.** Descriptive statistics of the Chi-square tests for PBC items.

| Item        | Descriptor        | Statistic | Boardwalk Meander |               | Silver Lakes |               |
|-------------|-------------------|-----------|-------------------|---------------|--------------|---------------|
|             |                   |           | Recycling         | Non-recycling | Recycling    | Non-recycling |
| <i>PBC1</i> | Not at all        | n         | 15                | 36            | 23           | 20            |
|             |                   | %         | 20.5              | 63.2          | 9.7          | 39.2          |
|             | Neutral           | n         | 13                | 10            | 23           | 10            |
|             |                   | %         | 17.8              | 17.5          | 9.7          | 19.6          |
|             | To a large extent | n         | 45                | 11            | 190          | 21            |
|             |                   | %         | 61.6              | 19.3          | 80.5         | 41.2          |
| <i>PBC2</i> | Not at all        | n         | 24                | 28            | 42           | 14            |
|             |                   | %         | 32.9              | 49.1          | 17.7         | 27.5          |
|             | Neutral           | n         | 14                | 11            | 29           | 13            |
|             |                   | %         | 19.2              | 19.3          | 12.2         | 25.5          |
|             | To a large extent | n         | 35                | 18            | 166          | 24            |
|             |                   | %         | 47.9              | 31.6          | 70.0         | 47.1          |
| <i>PBC3</i> | Not at all        | n         | 19                | 19            | 29           | 9             |
|             |                   | %         | 26.0              | 33.3          | 12.3         | 17.6          |
|             | Neutral           | n         | 14                | 14            | 26           | 11            |
|             |                   | %         | 19.2              | 24.6          | 11.0         | 21.6          |
|             | To a large extent | n         | 40                | 24            | 181          | 31            |
|             |                   | %         | 54.8              | 42.1          | 76.7         | 60.8          |
| <i>PBC4</i> | Not at all        | n         | 14                | 15            | 24           | 8             |
|             |                   | %         | 19.2              | 27.3          | 10.5         | 16.0          |
|             | Neutral           | n         | 10                | 10            | 32           | 7             |
|             |                   | %         | 13.7              | 18.2          | 14.0         | 14.0          |
|             | To a large extent | n         | 49                | 30            | 172          | 35            |
|             |                   | %         | 67.1              | 54.5          | 75.4         | 70.0          |
| <i>PBC5</i> | Not at all        | n         | 10                | 23            | 12           | 8             |
|             |                   | %         | 13.9              | 41.1          | 5.2          | 16.0          |
|             | Neutral           | n         | 19                | 14            | 12           | 7             |
|             |                   | %         | 26.4              | 25.0          | 5.2          | 14.0          |
|             | To a large extent | n         | 43                | 19            | 209          | 35            |
|             |                   | %         | 59.7              | 33.9          | 89.7         | 70.0          |
| <i>PBC6</i> | Not at all        | n         | 13                | 13            | 10           | 3             |
|             |                   | %         | 18.6              | 24.5          | 4.3          | 6.0           |
|             | Neutral           | n         | 10                | 17            | 7            | 6             |
|             |                   | %         | 14.3              | 32.1          | 3.0          | 12.0          |
|             | To a large extent | n         | 47                | 23            | 216          | 41            |
|             |                   | %         | 67.1              | 43.4          | 92.7         | 82.0          |
| <i>PBC7</i> | Not at all        | n         | 32                | 27            | 43           | 8             |
|             |                   | %         | 44.4              | 48.2          | 19.9         | 17.4          |
|             | Neutral           | n         | 10                | 9             | 16           | 5             |
|             |                   | %         | 13.9              | 16.1          | 7.4          | 10.9          |
|             | To a large extent | n         | 30                | 20            | 157          | 33            |
|             |                   | %         | 41.7              | 35.7          | 72.7         | 71.7          |
